# Supplementary material
Source: HighWire-hosted journal article supplement (https://svn.smart01.highwire.org/content/6/3/467)
Supplement: inline-supplementary-material-1 [file inline-supplementary-material-1.pdf]

---

**SUPPLEMENTARY MATERIALS**

**Associations Between Hemodynamics and Wall Enhancement of Intracranial  
Aneurysm**

---

**Supplementary Table 1** Scan parameters of T1-VISTA and 4D-flow MRI.

|                 | T1-VISTA              | 4D-flow MRI    |
|-----------------|-----------------------|----------------|
| TR/TE (ms)      | 800/21                | 8.0/3.6        |
| FOV             | 200 x 180 x 40        | 160 x 160 x 30 |
| Resolution (mm) | 0.6 x 0.6 x 0.6       | 1 x 1 x 1      |
| flip angle      | Variable <sup>1</sup> | 20             |
| VENC (cm/s)     | —                     | 120            |

VENC = Velocity encoding

**Reference:**

1. Qiao Y, Steinman DA, Qin Q, Etesami M, Schär M, Astor BC, Wasserman BA. Intracranial arterial wall imaging using three-dimensional high isotropic resolution black blood MRI at 3.0 Tesla. *J Magn Reson Imaging*. 2011;34:22–30.

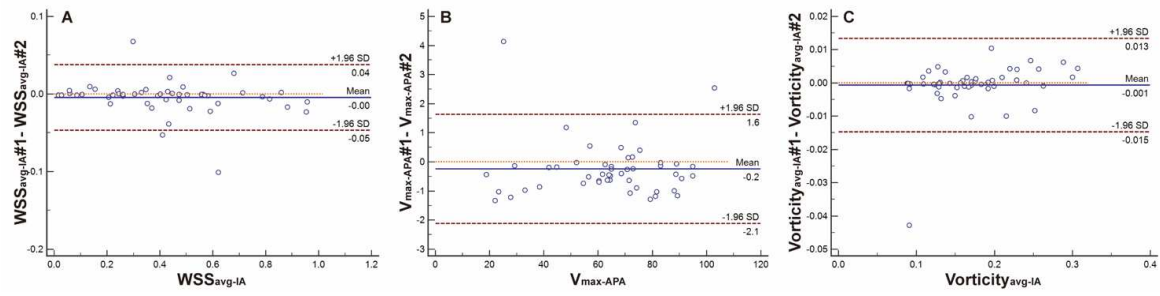

**Supplementary Figure 1** Bland-Altman plots for the interobserver reliability of continuous statistically significant variables measurement.

(A)  $WSS_{avg-IA}$ , (B)  $V_{max-APA}$ , and (C)  $Vorticity_{avg-IA}$ .
